# Supplementary material for: Short-Term Memory Deficits in the SLEEP Inbred Panel
Source: Clocks Sleep. 2019 Oct 28;1(4):471–88. doi: 10.3390/clockssleep1040036 (PMC7318870; doi:10.3390/clockssleep1040036)
Supplement: Supplementary file 1 [file clockssleep-01-00036-s001.zip]

Archive with 5 entries (5 files):
- Table S2.xlsx
- Table S3.xlsx
- Table_S1.xlsx
- Video S1.avi
- Supplementary Figures S1-S5.pdf
