# Supplementary material for: Short-Term Memory Deficits in the SLEEP Inbred Panel
Source: Clocks Sleep. 2019 Oct 28;1(4):471–88. doi: 10.3390/clockssleep1040036 (PMC7318870; doi:10.3390/clockssleep1040036)
Supplement: Supplementary file 1 [file clockssleep-01-00036-s001.zip › Table S2.xlsx]

## Sheet: Table S2
Line	Sex	Treatment	Number of flies	Day bout number	Day sleep (min.)	Night bout number	Night sleep (min.)	Waking activity (cts/min.)	Sleep latency (min.)	Day avg. bout length (min.)	Night avg. bout length (min.)
SIP_L1_1	Female	Isolated	15	31.2889	325.356	21.4	507.8	1.59887	41.5556	10.499	41.4183
SIP_L1_1	Female	Socially enriched	16	27.3333	422.583	12.9583	633.979	1.51468	20.3542	47.591	147.131
SIP_L1_1	Male	Isolated	14	21.5714	441.095	20.2143	573.429	2.03475	19.0714	22.1197	38.9157
SIP_L1_1	Male	Socially enriched	15	14.4667	567.489	8.77778	670.356	2.23727	13.9556	48.0429	174.881
SIP_L1_10	Female	Isolated	16	24.3125	261.125	20.4792	476.333	1.87101	59.125	10.3712	40.1564
SIP_L1_10	Female	Socially enriched	14	27	279.476	18.0952	530.976	1.65858	37.5	10.3532	61.8704
SIP_L1_10	Male	Isolated	16	22.375	429.438	17.75	587.396	2.03066	23.9583	20.628	68.7516
SIP_L1_10	Male	Socially enriched	14	16.7619	505.024	11.119	642.476	2.24969	17.4762	36.2273	201.152
SIP_L1_2	Female	Isolated	16	29.7292	413.542	25.6458	477.604	1.95882	39.125	14.6048	23.3858
SIP_L1_2	Female	Socially enriched	15	29.3111	434.733	15.3556	625.133	1.73733	21.2222	15.7771	80.318
SIP_L1_2	Male	Isolated	16	22.9167	495.354	22.1667	559.625	2.19097	21.5833	22.4321	28.0517
SIP_L1_2	Male	Socially enriched	16	22.9375	535.312	14.25	626.021	2.17853	15.1667	29.1501	128.827
SIP_L1_3	Female	Isolated	13	25.7179	287.205	16.8718	631.385	1.81903	16.0769	12.1127	80.5355
SIP_L1_3	Female	Socially enriched	15	26.1778	355.6	11.4222	658.867	1.54205	17.7111	45.3555	184.624
SIP_L1_3	Male	Isolated	13	18.5128	413.205	13.0256	644.821	2.12629	19.3333	23.9412	82.7891
SIP_L1_3	Male	Socially enriched	16	18.6875	530.979	13.125	634.75	2.22321	19.7708	31.8055	114.94
SIP_L1_4	Female	Isolated	15	27.0889	520.178	17.0222	612.222	1.9892	12	21.4627	119.833
SIP_L1_4	Female	Socially enriched	15	29.6	442.8	17.5778	565	2.02368	23.7778	16.6241	83.6872
SIP_L1_4	Male	Isolated	16	23.1875	519.833	14.625	621.875	2.07063	19.75	24.5551	92.2856
SIP_L1_4	Male	Socially enriched	15	19.7333	533.222	11.1333	649.667	1.98	19.1111	34.3152	108.564
SIP_L1_5	Female	Isolated	15	30.6	404.156	20.7111	538.489	1.69141	26.7556	13.3534	79.2682
SIP_L1_5	Female	Socially enriched	16	26.75	463.104	17.9167	572.604	1.99757	27.3333	18.909	60.0181
SIP_L1_5	Male	Isolated	16	20.2917	524.396	13.6875	617.083	2.05066	19.4375	36.0636	106.903
SIP_L1_5	Male	Socially enriched	15	19.4	531.956	13.5111	621.578	2.15921	19.3556	30.2397	69.8727
SIP_L1_6	Female	Isolated	15	29.5556	402.6	16.5778	617.956	1.83877	14.1111	14.382	77.6847
SIP_L1_6	Female	Socially enriched	12	27.6667	504.667	13.0278	646.556	1.91402	16.1111	20.2464	146.7
SIP_L1_6	Male	Isolated	15	22.2	524.133	14.8222	627	2.18032	20.0222	26.1373	56.87
SIP_L1_6	Male	Socially enriched	16	19.25	563.146	12.9583	639.375	2.49328	16.5	33.3707	116.869
SIP_L1_7	Female	Isolated	16	29.4792	306.833	17.5417	566.667	1.65959	22.0833	11.1335	85.1161
SIP_L1_7	Female	Socially enriched	13	28.5385	361.897	13.641	624.308	1.71772	23.1282	13.0521	99.0368
SIP_L1_7	Male	Isolated	16	20.6458	462.542	12.75	640.542	1.91666	21.9167	25.4414	119.04
SIP_L1_7	Male	Socially enriched	16	20.5417	551.667	15.3125	628.042	2.11708	19.1458	32.1838	68.2925
SIP_L1_8	Female	Isolated	16	35.0833	372.854	23.1667	435.042	1.86726	49.0208	10.5811	39.4773
SIP_L1_8	Female	Socially enriched	13	33.8462	342.256	17.359	590.231	1.57295	19.8974	9.97114	93.8357
SIP_L1_8	Male	Isolated	16	24.2292	545.708	19.3125	602.979	2.14333	14.5833	23.7848	39.2791
SIP_L1_8	Male	Socially enriched	15	23.4222	551.533	17.3111	594.533	2.51146	18.8	30.811	80.4277
SIP_L1_9	Female	Isolated	16	28.25	416.833	23.5833	527.771	1.96349	22.4583	15.2872	35.7245
SIP_L1_9	Female	Socially enriched	14	28.9524	393.119	21.2143	529.405	1.79908	29.4048	13.8977	48.559
SIP_L1_9	Male	Isolated	16	22.8958	469.375	20.4583	542.396	2.03617	23.5417	21.5409	31.1796
SIP_L1_9	Male	Socially enriched	16	22.4792	505.438	19.6875	568.75	2.59536	24.7917	53.5572	33.2502
SIP_L2_1	Female	Isolated	16	31.5625	344.271	12.8125	630	1.26146	25.8542	10.5643	69.6653
SIP_L2_1	Female	Socially enriched	16	27.9583	314.25	8.75	660.771	1.2489	20.2708	11.5106	174.467
SIP_L2_1	Male	Isolated	16	24.5417	243.812	23.75	512.458	1.46854	26.6875	9.62545	25.552
SIP_L2_1	Male	Socially enriched	16	23.2708	349.604	17.0417	584.75	1.60298	18.2708	16.3487	48.2396
SIP_L2_10	Female	Isolated	16	20.3333	601.771	6	690.604	2.06639	4.20833	48.3836	336.042
SIP_L2_10	Female	Socially enriched	16	24.4167	569.438	8.4375	656.104	2.64154	10.1667	45.8349	254.54
SIP_L2_10	Male	Isolated	16	24.625	378.062	20.9583	550.292	1.6934	20.4375	16.3733	34.4482
SIP_L2_10	Male	Socially enriched	16	26.8125	494.625	12.8958	645.229	1.99824	9.47917	20.6159	114.082
SIP_L2_2	Female	Isolated	16	30.4792	358.792	13.5208	631.25	1.48665	23.125	11.5074	71.9929
SIP_L2_2	Female	Socially enriched	16	25.2708	411	7.45833	671.208	1.48026	13.8542	18.3465	273.099
SIP_L2_2	Male	Isolated	16	20.0625	309.229	17.7708	580.479	1.6942	22.375	16.3011	36.409
SIP_L2_2	Male	Socially enriched	16	18.8333	445.354	12.1875	592.75	2.09343	24.4792	26.4097	80.3727
SIP_L2_3	Female	Isolated	16	32.3542	477.333	13.8333	644.042	1.65486	11.2917	15.9644	91.9499
SIP_L2_3	Female	Socially enriched	16	30.8958	477.604	8.6875	672.542	2.05475	8.625	18.0913	151.609
SIP_L2_3	Male	Isolated	15	23.1111	452.933	15.9333	608.333	1.48175	8.64444	67.1375	92.7333
SIP_L2_3	Male	Socially enriched	16	19.0417	553.646	11.9375	656.583	2.20537	8.1875	61.2143	107.998
SIP_L2_4	Female	Isolated	15	29.4889	519.489	10.4	672.067	1.92039	5	22.6724	201.695
SIP_L2_4	Female	Socially enriched	16	24.0625	528.708	6.79167	687.958	1.68824	7.16667	68.8298	326.675
SIP_L2_4	Male	Isolated	15	27.8667	404.289	18.7556	602.644	1.36239	19.6222	15.0117	43.2267
SIP_L2_4	Male	Socially enriched	15	19.1778	553.733	7.62222	685.444	2.15346	7.24444	34.2923	305.451
SIP_L2_5	Female	Isolated	15	29.1111	327.6	13.7556	646.778	1.22173	11.8444	11.5983	79.9591
SIP_L2_5	Female	Socially enriched	16	24.2917	514.75	3.41667	701.792	1.33782	8.25	24.1185	381.054
SIP_L2_5	Male	Isolated	16	25.2292	329.417	18.625	582.958	1.58106	13.7292	14.5706	44.5933
SIP_L2_5	Male	Socially enriched	15	16.6444	552.467	10.5111	674.822	1.96048	5.28889	49.5464	101.426
SIP_L2_6	Female	Isolated	16	35.125	424.583	8.91667	670.167	1.41417	13.375	12.667	148.094
SIP_L2_6	Female	Socially enriched	15	28.6444	529.156	4.66667	695	1.23805	11.3778	20.629	386.621
SIP_L2_6	Male	Isolated	16	23.4375	293.083	15.3125	573.125	1.35468	22.75	13.1896	80.0786
SIP_L2_6	Male	Socially enriched	16	24.5	498.833	9.22917	642.396	1.51679	19.5208	22.4449	142.427
SIP_L2_7	Female	Isolated	16	35.6667	514.021	10.3125	656.229	1.59736	17.6667	15.9351	143.871
SIP_L2_7	Female	Socially enriched	16	29.2083	477.771	6.29167	678.688	1.71616	17.7917	17.7697	268.917
SIP_L2_7	Male	Isolated	16	31.0833	437.854	22.9792	535	1.4981	19.7708	14.805	33.2316
SIP_L2_7	Male	Socially enriched	16	22.4583	410.312	12.3333	578.125	1.81728	35.625	20.4612	98.2604
SIP_L2_8	Female	Isolated	16	35.3125	481.562	12.1458	662.312	1.5386	7.6875	14.0748	129.789
SIP_L2_8	Female	Socially enriched	16	30.6875	464.833	8.41667	663.396	1.29138	14.4583	16.248	168.458
SIP_L2_8	Male	Isolated	16	24.75	293.646	21.4375	575.938	1.38461	15.7917	12.0104	31.5226
SIP_L2_8	Male	Socially enriched	16	22.3958	521.604	15.5208	613.729	1.73248	15.4375	35.4931	109.226
SIP_S1_1	Female	Isolated	14	9.92857	76.7619	19.6429	271.476	1.84931	80.0952	7.22823	14.7854
SIP_S1_1	Female	Socially enriched	16	8.125	70.9583	13.7083	265.5	2.0467	155.792	7.99072	22.4731
SIP_S1_1	Male	Isolated	16	6.97917	93.3958	14.0625	343.562	2.45492	87.3333	13.1901	27.9541
SIP_S1_1	Male	Socially enriched	15	12.6667	226	10.7333	299.578	2.58097	129.244	18.0864	33.3631
SIP_S1_10	Female	Isolated	15	22.7333	216.267	15.8667	176.511	1.37587	119.289	9.69816	10.4308
SIP_S1_10	Female	Socially enriched	16	15.5625	137.042	15.9583	168.812	1.45316	162.167	8.38078	9.70916
SIP_S1_10	Male	Isolated	15	18.7111	192.044	8.28889	116.778	1.94353	271.067	11.1414	13.8148
SIP_S1_10	Male	Socially enriched	15	22.4222	274.289	11.9111	218.622	1.80965	164.022	12.3488	19.7138
SIP_S1_2	Female	Isolated	16	10.5	84.2292	17.8542	254.875	1.70115	65.6042	8.19723	13.8042
SIP_S1_2	Female	Socially enriched	16	9.3125	83.9792	14.625	209.104	1.96105	147.5	8.97911	14.2369
SIP_S1_2	Male	Isolated	15	15.0889	138.867	8.64444	146.4	1.88956	221.733	8.55164	18.4976
SIP_S1_2	Male	Socially enriched	16	17.1042	212.021	6.45833	115.042	2.18948	340.708	11.8114	16.3323
SIP_S1_3	Female	Isolated	16	13.0625	133.062	17.5208	241.021	1.75981	70.9583	11.3109	14.3817
SIP_S1_3	Female	Socially enriched	15	13.4889	119.267	17.9556	227.044	1.67141	74.4	7.9433	12.1388
SIP_S1_3	Male	Isolated	16	17.6458	213.354	9.16667	150.958	2.04293	226.417	13.7431	25.8737
SIP_S1_3	Male	Socially enriched	16	17.4167	282.479	10.3333	255.042	2.05861	138.375	45.5414	67.4949
SIP_S1_4	Female	Isolated	16	16.5208	148.604	21.4375	467.188	1.73489	39.4583	8.86665	25.4766
SIP_S1_4	Female	Socially enriched	16	18	174.062	17.8333	503.958	1.58553	49.5833	9.62712	33.9468
SIP_S1_4	Male	Isolated	16	24	292.708	12.125	301.229	1.70198	140.875	13.2188	27.8998
SIP_S1_4	Male	Socially enriched	16	18.4375	266.875	12.2708	372.896	2.00517	94.3958	15.1816	33.0315
SIP_S1_5	Female	Isolated	16	32.3958	303.167	24.7292	371.958	1.40295	30.4167	9.31222	15.9084
SIP_S1_5	Female	Socially enriched	14	20.1905	193.071	22.5	469.333	1.41322	39.619	10.1324	24.6075
SIP_S1_5	Male	Isolated	15	22.1778	294.622	11.1778	263.533	1.61389	126.933	14.4325	30.7971
SIP_S1_5	Male	Socially enriched	14	26.9048	352.31	9.30952	254.762	1.81332	192.571	14.5203	26.1868
SIP_S1_6	Female	Isolated	16	25.8333	226.208	20.3958	257.688	1.32081	88.0833	8.68092	13.5322
SIP_S1_6	Female	Socially enriched	16	13.3125	127.979	17.6667	249.021	1.46372	91.7917	9.11396	17.9186
SIP_S1_6	Male	Isolated	16	23.6875	255.625	6.54167	89.9792	1.92106	286.229	11.6239	13.7217
SIP_S1_6	Male	Socially enriched	16	19.6458	290.458	10.6875	180.062	1.88368	186.812	15.4025	18.4642
SIP_S1_7	Female	Isolated	16	14.5	123.292	18.4167	277.5	1.58506	59.375	8.8303	15.4641
SIP_S1_7	Female	Socially enriched	16	13.6042	117.354	16.1667	241.688	1.5442	106.438	8.23808	16.295
SIP_S1_7	Male	Isolated	15	11.3333	139.556	5.97778	82.7333	2.23974	301.6	12.2533	13.4724
SIP_S1_7	Male	Socially enriched	16	15.4583	193.604	9.54167	175.208	2.33354	199.042	13.4901	20.0678
SIP_S1_8	Female	Isolated	16	17.1875	139.229	21.3125	399.125	1.72377	69.9792	8.1084	19.2356
SIP_S1_8	Female	Socially enriched	16	12.8542	128.604	18.5208	546.771	1.59056	36.0833	9.83924	37.0783
SIP_S1_8	Male	Isolated	15	24.1778	310.022	15.5778	300.089	1.90813	139.111	13.8113	23.594
SIP_S1_8	Male	Socially enriched	16	16.9792	329.896	13.5	334.125	2.06669	130.75	22.1641	26.6675
SIP_S1_9	Female	Isolated	15	18.9111	154.756	15.9111	179.733	1.39854	80.9333	8.56371	11.2982
SIP_S1_9	Female	Socially enriched	15	15.3556	137.022	17.6889	243.511	1.50506	90.5556	8.66698	13.534
SIP_S1_9	Male	Isolated	15	14.0667	155.756	7.04444	90.5333	1.87331	369.422	10.5958	12.8601
SIP_S1_9	Male	Socially enriched	15	18.2222	295.4	10.4667	253.622	2.20264	175.778	16.9301	25.9262
SIP_S2_1	Female	Isolated	16	7.875	63.0833	7.45833	59.5208	2.08037	292.771	8.25085	7.65063
SIP_S2_1	Female	Socially enriched	16	5.5625	54.9792	2.75	21.0208	2.31555	452	7.8369	6.55642
SIP_S2_1	Male	Isolated	16	13.625	157.083	9.1875	98.6875	1.93522	303.083	10.8656	9.67546
SIP_S2_1	Male	Socially enriched	16	14.8542	224.625	4.0625	39.1042	2.47698	485.812	15.0089	7.71246
SIP_S2_10	Female	Isolated	15	10.7333	94.6222	13.1333	163.489	1.67547	150.089	7.97383	10.9804
SIP_S2_10	Female	Socially enriched	13	7.66667	71.4615	10.3077	117.487	2.01545	276.692	8.26517	9.80454
SIP_S2_10	Male	Isolated	15	8.28889	96.9778	4.06667	36.0222	1.97299	411.244	10.1907	7.43906
SIP_S2_10	Male	Socially enriched	16	15.6458	256.5	5.95833	75.2083	2.37964	356.458	17.3542	10.961
SIP_S2_2	Female	Isolated	15	13.9333	162.533	7.04444	98.5778	1.81773	231.289	27.8242	41.5346
SIP_S2_2	Female	Socially enriched	16	7.41667	71.6458	4.39583	40.3125	2.13068	324.729	9.18324	8.6754
SIP_S2_2	Male	Isolated	15	11.8889	143.8	4	31.6222	2.09947	446.756	11.4334	7.32781
SIP_S2_2	Male	Socially enriched	15	12.2	210.956	1.82222	19.5111	2.68712	523.333	14.9641	8.46368
SIP_S2_3	Female	Isolated	16	6.4375	62.9167	8.10417	77.3958	2.10989	315.208	7.84079	9.547
SIP_S2_3	Female	Socially enriched	15	10.5333	117.467	8.51111	81.6889	2.18098	247.156	9.47352	8.48268
SIP_S2_3	Male	Isolated	16	10.6042	119.25	2.5625	21.9375	2.33609	477.417	10.7043	8.10424
SIP_S2_3	Male	Socially enriched	16	13.7083	230.458	3.54167	54.9792	2.66405	463.104	19.1006	15.3912
SIP_S2_4	Female	Isolated	14	5.88095	57.5476	4.38095	63.381	2.2738	387.143	8.20382	9.61535
SIP_S2_4	Female	Socially enriched	15	5.44444	55.8222	4.91111	60.7778	2.56373	376.022	9.90138	9.13097
SIP_S2_4	Male	Isolated	13	11.7692	129.179	3.89744	68.1538	2.03099	405.103	11.9089	14.5121
SIP_S2_4	Male	Socially enriched	16	12.0833	257.667	6.22917	92.7917	2.5622	429.812	21.9066	17.9142
SIP_S2_5	Female	Isolated	14	14.381	112.31	10.1667	103.952	1.76239	274.452	7.65596	9.6431
SIP_S2_5	Female	Socially enriched	14	3.35714	31.3095	4.33333	33.881	2.33633	435.024	9.2171	7.75267
SIP_S2_5	Male	Isolated	16	10.4167	106.646	2.33333	23.8125	2.27284	476.208	9.76803	9.47353
SIP_S2_5	Male	Socially enriched	16	12.0417	217.583	4.8125	61.1875	2.22914	380	19.3514	9.86238
SIP_S2_6	Female	Isolated	15	7.28889	69.1556	6.64444	68.9556	2.17898	369	7.43476	8.83103
SIP_S2_6	Female	Socially enriched	16	12	141.771	5.16667	62.5833	2.16725	306.354	25.2392	33.0144
SIP_S2_6	Male	Isolated	16	10.9167	149.375	3.875	52.3125	2.48056	492.104	13.1555	10.5071
SIP_S2_6	Male	Socially enriched	16	14.875	261.5	5.125	76.1458	2.51528	396.875	18.8057	10.8611
SIP_S2_7	Female	Isolated	14	8.21429	73.2381	8.2381	66.0952	1.63158	251.643	7.30592	7.14513
SIP_S2_7	Female	Socially enriched	15	8.44444	86.2667	5.22222	52.1556	2.15184	437.733	8.96471	8.42145
SIP_S2_7	Male	Isolated	14	6.69048	58.0238	3.09524	29.7619	1.81454	472.048	7.89884	8.06327
SIP_S2_7	Male	Socially enriched	16	12.875	164.521	4.08333	64.5417	2.15729	402.146	12.2457	12.5291
SIP_S2_8	Female	Isolated	15	9.31111	78.6889	4.95556	41.2444	2.00726	349.022	7.08268	7.25529
SIP_S2_8	Female	Socially enriched	16	9.91667	108.417	5.02083	46.9583	2.31946	325.646	9.22922	8.24755
SIP_S2_8	Male	Isolated	16	12.1875	136.458	4.41667	41.1042	2.06748	397.25	10.6048	8.59341
SIP_S2_8	Male	Socially enriched	16	15.875	248.438	6.27083	94.3542	2.46045	378.333	15.3868	13.4522
SIP_S2_9	Female	Isolated	16	11.1042	78.4167	8.29167	61.1042	1.88835	240.292	6.79026	6.74977
SIP_S2_9	Female	Socially enriched	15	12.0444	108.156	8.55556	74.2	1.97014	266.133	8.15054	8.11492
SIP_S2_9	Male	Isolated	16	13.7917	145.979	4.89583	34.6875	1.98519	402.021	9.72683	6.62402
SIP_S2_9	Male	Socially enriched	15	19.6	300.756	10.4222	135.022	2.27963	305.889	16.1333	12.4211
