# Supplementary material for: Short-Term Memory Deficits in the SLEEP Inbred Panel
Source: Clocks Sleep. 2019 Oct 28;1(4):471–88. doi: 10.3390/clockssleep1040036 (PMC7318870; doi:10.3390/clockssleep1040036)
Supplement: Supplementary file 1 [file clockssleep-01-00036-s001.zip › Table S3.xlsx]

## Sheet: Table S3
Line	Sex	Trait	DF	SS	MS	F Value	P-value
SIP_L1_1	Female	Day sleep (min.)	1	73186.4	73186.4	5.33	0.0283
SIP_L1_10	Female	Day sleep (min.)	1	2514.52	2514.52	0.22	0.6457
SIP_L1_2	Female	Day sleep (min.)	1	3476.8	3476.8	0.48	0.4945
SIP_L1_3	Female	Day sleep (min.)	1	32577.9	32577.9	2.38	0.1347
SIP_L1_4	Female	Day sleep (min.)	1	44904.9	44904.9	5.6	0.0251
SIP_L1_5	Female	Day sleep (min.)	1	26902.8	26902.8	2.7	0.1113
SIP_L1_6	Female	Day sleep (min.)	1	69450.7	69450.7	11.05	0.0027
SIP_L1_7	Female	Day sleep (min.)	1	21747.2	21747.2	2.05	0.1641
SIP_L1_8	Female	Day sleep (min.)	1	6714.98	6714.98	0.63	0.4354
SIP_L1_9	Female	Day sleep (min.)	1	4199.01	4199.01	0.35	0.5579
SIP_L2_1	Female	Day sleep (min.)	1	7210	7210	0.73	0.4004
SIP_L2_10	Female	Day sleep (min.)	1	8363.56	8363.56	0.84	0.3663
SIP_L2_2	Female	Day sleep (min.)	1	21805.7	21805.7	1.27	0.2678
SIP_L2_3	Female	Day sleep (min.)	1	0.5868	0.5868	0	0.9943
SIP_L2_4	Female	Day sleep (min.)	1	658.05	658.05	0.05	0.8284
SIP_L2_5	Female	Day sleep (min.)	1	271162	271162	21.48	<.0001
SIP_L2_6	Female	Day sleep (min.)	1	84660.8	84660.8	9.12	0.0052
SIP_L2_7	Female	Day sleep (min.)	1	10512.5	10512.5	0.9	0.35
SIP_L2_8	Female	Day sleep (min.)	1	2238.92	2238.92	0.36	0.5555
SIP_S1_1	Female	Day sleep (min.)	1	251.488	251.488	0.06	0.8035
SIP_S1_10	Female	Day sleep (min.)	1	48593	48593	4.19	0.0498
SIP_S1_2	Female	Day sleep (min.)	1	0.5	0.5	0	0.993
SIP_S1_3	Female	Day sleep (min.)	1	1473.48	1473.48	0.15	0.7027
SIP_S1_4	Female	Day sleep (min.)	1	5185.01	5185.01	0.75	0.3926
SIP_S1_5	Female	Day sleep (min.)	1	90503.2	90503.2	15.25	0.0005
SIP_S1_6	Female	Day sleep (min.)	1	77191.8	77191.8	12.66	0.0013
SIP_S1_7	Female	Day sleep (min.)	1	282.031	282.031	0.05	0.8258
SIP_S1_8	Female	Day sleep (min.)	1	903.125	903.125	0.11	0.7399
SIP_S1_9	Female	Day sleep (min.)	1	2358.53	2358.53	0.48	0.4961
SIP_S2_1	Female	Day sleep (min.)	1	525.42	525.42	0.12	0.7319
SIP_S2_10	Female	Day sleep (min.)	1	3735.76	3735.76	0.48	0.4948
SIP_S2_2	Female	Day sleep (min.)	1	63952.5	63952.5	3.84	0.0598
SIP_S2_3	Female	Day sleep (min.)	1	23037.7	23037.7	2.8	0.1051
SIP_S2_4	Female	Day sleep (min.)	1	21.5575	21.5575	0	0.9513
SIP_S2_5	Female	Day sleep (min.)	1	45927	45927	21.95	<.0001
SIP_S2_6	Female	Day sleep (min.)	1	40823.1	40823.1	3.94	0.0565
SIP_S2_7	Female	Day sleep (min.)	1	1229.18	1229.18	0.17	0.6874
SIP_S2_8	Female	Day sleep (min.)	1	6841.86	6841.86	0.55	0.4656
SIP_S2_9	Female	Day sleep (min.)	1	6846.98	6846.98	1.58	0.2181
SIP_L1_1	Male	Day sleep (min.)	1	115684	115684	46.55	<.0001
SIP_L1_10	Male	Day sleep (min.)	1	42659.2	42659.2	9.3	0.005
SIP_L1_2	Male	Day sleep (min.)	1	12773.3	12773.3	5.64	0.0241
SIP_L1_3	Male	Day sleep (min.)	1	99486.6	99486.6	26.39	<.0001
SIP_L1_4	Male	Day sleep (min.)	1	1387.84	1387.84	0.3	0.5883
SIP_L1_5	Male	Day sleep (min.)	1	442.447	442.447	0.11	0.7467
SIP_L1_6	Male	Day sleep (min.)	1	11783	11783	3.63	0.0667
SIP_L1_7	Male	Day sleep (min.)	1	63546.1	63546.1	16.59	0.0003
SIP_L1_8	Male	Day sleep (min.)	1	262.689	262.689	0.06	0.8047
SIP_L1_9	Male	Day sleep (min.)	1	10404	10404	2.55	0.1206
SIP_L2_1	Male	Day sleep (min.)	1	89535	89535	8.21	0.0075
SIP_L2_10	Male	Day sleep (min.)	1	108695	108695	9.36	0.0046
SIP_L2_2	Male	Day sleep (min.)	1	148240	148240	11.19	0.0022
SIP_L2_3	Male	Day sleep (min.)	1	78526.5	78526.5	4.92	0.0345
SIP_L2_4	Male	Day sleep (min.)	1	167502	167502	23.19	<.0001
SIP_L2_5	Male	Day sleep (min.)	1	385171	385171	51.35	<.0001
SIP_L2_6	Male	Day sleep (min.)	1	338664	338664	34.88	<.0001
SIP_L2_7	Male	Day sleep (min.)	1	6068.35	6068.35	0.51	0.4811
SIP_L2_8	Male	Day sleep (min.)	1	415720	415720	33.94	<.0001
SIP_S1_1	Male	Day sleep (min.)	1	136133	136133	10.94	0.0025
SIP_S1_10	Male	Day sleep (min.)	1	50731.1	50731.1	8.25	0.0077
SIP_S1_2	Male	Day sleep (min.)	1	41431.2	41431.2	2.74	0.1084
SIP_S1_3	Male	Day sleep (min.)	1	38226.1	38226.1	2.44	0.1285
SIP_S1_4	Male	Day sleep (min.)	1	5338.89	5338.89	1.07	0.309
SIP_S1_5	Male	Day sleep (min.)	1	24098	24098	3.1	0.0895
SIP_S1_6	Male	Day sleep (min.)	1	9706.89	9706.89	0.76	0.3911
SIP_S1_7	Male	Day sleep (min.)	1	22616.1	22616.1	2.67	0.1129
SIP_S1_8	Male	Day sleep (min.)	1	3057.76	3057.76	0.29	0.5921
SIP_S1_9	Male	Day sleep (min.)	1	146254	146254	11.86	0.0018
SIP_S2_1	Male	Day sleep (min.)	1	36495	36495	2.57	0.1191
SIP_S2_10	Male	Day sleep (min.)	1	197012	197012	19.72	0.0001
SIP_S2_2	Male	Day sleep (min.)	1	33824	33824	1.9	0.1794
SIP_S2_3	Male	Day sleep (min.)	1	98938.3	98938.3	7.33	0.0111
SIP_S2_4	Male	Day sleep (min.)	1	118409	118409	12.65	0.0014
SIP_S2_5	Male	Day sleep (min.)	1	98457	98457	7.56	0.01
SIP_S2_6	Male	Day sleep (min.)	1	100576	100576	4.34	0.0458
SIP_S2_7	Male	Day sleep (min.)	1	84684.1	84684.1	11.12	0.0024
SIP_S2_8	Male	Day sleep (min.)	1	100315	100315	7.92	0.0086
SIP_S2_9	Male	Day sleep (min.)	1	185464	185464	12.63	0.0013
SIP_L1_1	Female	Avg. day bout length (min.)	1	10651.5	10651.5	1.26	0.2708
SIP_L1_10	Female	Avg. day bout length (min.)	1	0.0024	0.0024	0	0.9867
SIP_L1_2	Female	Avg. day bout length (min.)	1	10.6398	10.6398	0.53	0.4739
SIP_L1_3	Female	Avg. day bout length (min.)	1	7696.12	7696.12	0.86	0.3624
SIP_L1_4	Female	Avg. day bout length (min.)	1	175.594	175.594	3.42	0.0749
SIP_L1_5	Female	Avg. day bout length (min.)	1	238.951	238.951	7.57	0.0101
SIP_L1_6	Female	Avg. day bout length (min.)	1	229.274	229.274	8.58	0.0072
SIP_L1_7	Female	Avg. day bout length (min.)	1	26.4017	26.4017	1.55	0.2233
SIP_L1_8	Female	Avg. day bout length (min.)	1	2.6682	2.6682	0.55	0.4649
SIP_L1_9	Female	Avg. day bout length (min.)	1	14.4155	14.4155	0.91	0.3489
SIP_L2_1	Female	Avg. day bout length (min.)	1	7.1627	7.1627	1.39	0.2473
SIP_L2_10	Female	Avg. day bout length (min.)	1	51.9643	51.9643	0.01	0.9124
SIP_L2_2	Female	Avg. day bout length (min.)	1	374.192	374.192	7.54	0.0101
SIP_L2_3	Female	Avg. day bout length (min.)	1	36.1891	36.1891	0.55	0.4659
SIP_L2_4	Female	Avg. day bout length (min.)	1	16494.2	16494.2	1.04	0.3161
SIP_L2_5	Female	Avg. day bout length (min.)	1	1213.6	1213.6	21.89	<.0001
SIP_L2_6	Female	Avg. day bout length (min.)	1	490.788	490.788	10.93	0.0025
SIP_L2_7	Female	Avg. day bout length (min.)	1	26.9265	26.9265	0.6	0.4459
SIP_L2_8	Female	Avg. day bout length (min.)	1	37.7829	37.7829	1.92	0.1757
SIP_S1_1	Female	Avg. day bout length (min.)	1	4.341	4.341	1.27	0.2691
SIP_S1_10	Female	Avg. day bout length (min.)	1	13.4362	13.4362	2.06	0.1617
SIP_S1_2	Female	Avg. day bout length (min.)	1	4.7329	4.7329	0.39	0.5387
SIP_S1_3	Female	Avg. day bout length (min.)	1	87.8009	87.8009	5.17	0.0305
SIP_S1_4	Female	Avg. day bout length (min.)	1	4.6266	4.6266	0.79	0.3814
SIP_S1_5	Female	Avg. day bout length (min.)	1	5.0226	5.0226	0.44	0.5117
SIP_S1_6	Female	Avg. day bout length (min.)	1	1.5002	1.5002	0.41	0.5265
SIP_S1_7	Female	Avg. day bout length (min.)	1	2.7154	2.7154	0.48	0.495
SIP_S1_8	Female	Avg. day bout length (min.)	1	23.9664	23.9664	3.69	0.0641
SIP_S1_9	Female	Avg. day bout length (min.)	1	0.08	0.08	0.02	0.8992
SIP_S2_1	Female	Avg. day bout length (min.)	1	1.3266	1.3266	0.1	0.7576
SIP_S2_10	Female	Avg. day bout length (min.)	1	0.465	0.465	0.13	0.7257
SIP_S2_2	Female	Avg. day bout length (min.)	1	2606.15	2606.15	0.88	0.3561
SIP_S2_3	Female	Avg. day bout length (min.)	1	19.3043	19.3043	2.98	0.0955
SIP_S2_4	Female	Avg. day bout length (min.)	1	17.9818	17.9818	2	0.1705
SIP_S2_5	Female	Avg. day bout length (min.)	1	16.4282	16.4282	4.54	0.0432
SIP_S2_6	Female	Avg. day bout length (min.)	1	2454.19	2454.19	1.27	0.2688
SIP_S2_7	Female	Avg. day bout length (min.)	1	19.9252	19.9252	3.69	0.0654
SIP_S2_8	Female	Avg. day bout length (min.)	1	35.6721	35.6721	2.74	0.1086
SIP_S2_9	Female	Avg. day bout length (min.)	1	14.3255	14.3255	6.54	0.0161
SIP_L1_1	Male	Avg. day bout length (min.)	1	4866.31	4866.31	15.14	0.0006
SIP_L1_10	Male	Avg. day bout length (min.)	1	1816.92	1816.92	16.63	0.0003
SIP_L1_2	Male	Avg. day bout length (min.)	1	361.051	361.051	2.27	0.1421
SIP_L1_3	Male	Avg. day bout length (min.)	1	443.594	443.594	5.02	0.0335
SIP_L1_4	Male	Avg. day bout length (min.)	1	737.487	737.487	4.21	0.0492
SIP_L1_5	Male	Avg. day bout length (min.)	1	262.595	262.595	0.35	0.5602
SIP_L1_6	Male	Avg. day bout length (min.)	1	405.076	405.076	3.22	0.0831
SIP_L1_7	Male	Avg. day bout length (min.)	1	363.681	363.681	1.89	0.179
SIP_L1_8	Male	Avg. day bout length (min.)	1	382.197	382.197	2.39	0.1326
SIP_L1_9	Male	Avg. day bout length (min.)	1	8200.32	8200.32	1.03	0.3187
SIP_L2_1	Male	Avg. day bout length (min.)	1	361.618	361.618	12.87	0.0012
SIP_L2_10	Male	Avg. day bout length (min.)	1	143.999	143.999	3.34	0.0775
SIP_L2_2	Male	Avg. day bout length (min.)	1	817.471	817.471	10.26	0.0032
SIP_L2_3	Male	Avg. day bout length (min.)	1	271.62	271.62	0.01	0.9085
SIP_L2_4	Male	Avg. day bout length (min.)	1	2788.05	2788.05	23.66	<.0001
SIP_L2_5	Male	Avg. day bout length (min.)	1	9470.76	9470.76	8.86	0.0058
SIP_L2_6	Male	Avg. day bout length (min.)	1	685.284	685.284	18.78	0.0002
SIP_L2_7	Male	Avg. day bout length (min.)	1	255.943	255.943	4.17	0.0499
SIP_L2_8	Male	Avg. day bout length (min.)	1	4411.49	4411.49	5.65	0.024
SIP_S1_1	Male	Avg. day bout length (min.)	1	179.804	179.804	2.56	0.1207
SIP_S1_10	Male	Avg. day bout length (min.)	1	10.933	10.933	0.88	0.3557
SIP_S1_2	Male	Avg. day bout length (min.)	1	82.266	82.266	8.1	0.0081
SIP_S1_3	Male	Avg. day bout length (min.)	1	8089.05	8089.05	1.13	0.2972
SIP_S1_4	Male	Avg. day bout length (min.)	1	30.8225	30.8225	2.18	0.1503
SIP_S1_5	Male	Avg. day bout length (min.)	1	0.0558	0.0558	0	0.9677
SIP_S1_6	Male	Avg. day bout length (min.)	1	114.22	114.22	3.52	0.0703
SIP_S1_7	Male	Avg. day bout length (min.)	1	11.8436	11.8436	0.32	0.5744
SIP_S1_8	Male	Avg. day bout length (min.)	1	540.15	540.15	9.78	0.004
SIP_S1_9	Male	Avg. day bout length (min.)	1	300.932	300.932	11.57	0.002
SIP_S2_1	Male	Avg. day bout length (min.)	1	132.904	132.904	6.1	0.0197
SIP_S2_10	Male	Avg. day bout length (min.)	1	397.276	397.276	9.2	0.0051
SIP_S2_2	Male	Avg. day bout length (min.)	1	93.4934	93.4934	2.07	0.1612
SIP_S2_3	Male	Avg. day bout length (min.)	1	545.781	545.781	3.43	0.0741
SIP_S2_4	Male	Avg. day bout length (min.)	1	716.908	716.908	16.99	0.0003
SIP_S2_5	Male	Avg. day bout length (min.)	1	734.73	734.73	18.91	0.0001
SIP_S2_6	Male	Avg. day bout length (min.)	1	255.399	255.399	1.73	0.1984
SIP_S2_7	Male	Avg. day bout length (min.)	1	141.084	141.084	7.79	0.0094
SIP_S2_8	Male	Avg. day bout length (min.)	1	182.934	182.934	7.1	0.0123
SIP_S2_9	Male	Avg. day bout length (min.)	1	317.749	317.749	10.34	0.0032
SIP_L1_1	Female	Avg. night bout length (min.)	1	86518	86518	4.97	0.0336
SIP_L1_10	Female	Avg. night bout length (min.)	1	3520.52	3520.52	1.1	0.3042
SIP_L1_2	Female	Avg. night bout length (min.)	1	25093.8	25093.8	8.26	0.0075
SIP_L1_3	Female	Avg. night bout length (min.)	1	75454.2	75454.2	3.7	0.0654
SIP_L1_4	Female	Avg. night bout length (min.)	1	9799.06	9799.06	0.36	0.556
SIP_L1_5	Female	Avg. night bout length (min.)	1	2868.91	2868.91	0.38	0.5415
SIP_L1_6	Female	Avg. night bout length (min.)	1	31754.1	31754.1	2.29	0.1428
SIP_L1_7	Female	Avg. night bout length (min.)	1	1389.91	1389.91	0.2	0.6556
SIP_L1_8	Female	Avg. night bout length (min.)	1	21193.3	21193.3	2.6	0.1185
SIP_L1_9	Female	Avg. night bout length (min.)	1	1229.94	1229.94	0.52	0.4776
SIP_L2_1	Female	Avg. night bout length (min.)	1	87866.8	87866.8	4.61	0.0401
SIP_L2_10	Female	Avg. night bout length (min.)	1	53139.9	53139.9	1	0.3254
SIP_L2_2	Female	Avg. night bout length (min.)	1	323550	323550	11.75	0.0018
SIP_L2_3	Female	Avg. night bout length (min.)	1	28474	28474	2.36	0.1349
SIP_L2_4	Female	Avg. night bout length (min.)	1	120931	120931	2.24	0.1454
SIP_L2_5	Female	Avg. night bout length (min.)	1	701867	701867	28.06	<.0001
SIP_L2_6	Female	Avg. night bout length (min.)	1	440479	440479	24.1	<.0001
SIP_L2_7	Female	Avg. night bout length (min.)	1	125092	125092	4.13	0.0512
SIP_L2_8	Female	Avg. night bout length (min.)	1	11962.5	11962.5	0.58	0.4515
SIP_S1_1	Female	Avg. night bout length (min.)	1	441.292	441.292	2.73	0.1095
SIP_S1_10	Female	Avg. night bout length (min.)	1	4.0316	4.0316	0.23	0.6342
SIP_S1_2	Female	Avg. night bout length (min.)	1	1.4978	1.4978	0.04	0.8456
SIP_S1_3	Female	Avg. night bout length (min.)	1	38.9482	38.9482	1.15	0.2914
SIP_S1_4	Female	Avg. night bout length (min.)	1	573.955	573.955	2.62	0.1158
SIP_S1_5	Female	Avg. night bout length (min.)	1	565.037	565.037	5.99	0.0209
SIP_S1_6	Female	Avg. night bout length (min.)	1	153.923	153.923	0.47	0.4976
SIP_S1_7	Female	Avg. night bout length (min.)	1	5.5224	5.5224	0.04	0.8348
SIP_S1_8	Female	Avg. night bout length (min.)	1	2546.89	2546.89	8.76	0.006
SIP_S1_9	Female	Avg. night bout length (min.)	1	37.49	37.49	2.35	0.1367
SIP_S2_1	Female	Avg. night bout length (min.)	1	9.2695	9.2695	4.25	0.0483
SIP_S2_10	Female	Avg. night bout length (min.)	1	9.2171	9.2171	0.47	0.4978
SIP_S2_2	Female	Avg. night bout length (min.)	1	7558.07	7558.07	0.92	0.3476
SIP_S2_3	Female	Avg. night bout length (min.)	1	7.9294	7.9294	0.58	0.4535
SIP_S2_4	Female	Avg. night bout length (min.)	1	1.4641	1.4641	0.06	0.8148
SIP_S2_5	Female	Avg. night bout length (min.)	1	23.0919	23.0919	1.68	0.2069
SIP_S2_6	Female	Avg. night bout length (min.)	1	3942.23	3942.23	0.81	0.3773
SIP_S2_7	Female	Avg. night bout length (min.)	1	10.9808	10.9808	2.31	0.1408
SIP_S2_8	Female	Avg. night bout length (min.)	1	6.362	6.362	1.82	0.1904
SIP_S2_9	Female	Avg. night bout length (min.)	1	13.9772	13.9772	6.59	0.0159
SIP_L1_1	Male	Avg. night bout length (min.)	1	133869	133869	8.23	0.0079
SIP_L1_10	Male	Avg. night bout length (min.)	1	130889	130889	4.84	0.0362
SIP_L1_2	Male	Avg. night bout length (min.)	1	81245.2	81245.2	7.44	0.0106
SIP_L1_3	Male	Avg. night bout length (min.)	1	7414.03	7414.03	0.77	0.3877
SIP_L1_4	Male	Avg. night bout length (min.)	1	2051.5	2051.5	0.21	0.6523
SIP_L1_5	Male	Avg. night bout length (min.)	1	10615.8	10615.8	1.26	0.2703
SIP_L1_6	Male	Avg. night bout length (min.)	1	27870.2	27870.2	4.03	0.0542
SIP_L1_7	Male	Avg. night bout length (min.)	1	20602.7	20602.7	2.02	0.1655
SIP_L1_8	Male	Avg. night bout length (min.)	1	13108.7	13108.7	2.47	0.1268
SIP_L1_9	Male	Avg. night bout length (min.)	1	34.2978	34.2978	0.23	0.6371
SIP_L2_1	Male	Avg. night bout length (min.)	1	4117.8	4117.8	5.29	0.0286
SIP_L2_10	Male	Avg. night bout length (min.)	1	50731.9	50731.9	11.4	0.0021
SIP_L2_2	Male	Avg. night bout length (min.)	1	15462.4	15462.4	4.18	0.0497
SIP_L2_3	Male	Avg. night bout length (min.)	1	1803.88	1803.88	0.08	0.781
SIP_L2_4	Male	Avg. night bout length (min.)	1	515712	515712	14.29	0.0008
SIP_L2_5	Male	Avg. night bout length (min.)	1	25006	25006	7.39	0.011
SIP_L2_6	Male	Avg. night bout length (min.)	1	31098.5	31098.5	3	0.0934
SIP_L2_7	Male	Avg. night bout length (min.)	1	33830	33830	4.89	0.0348
SIP_L2_8	Male	Avg. night bout length (min.)	1	48302.1	48302.1	5.55	0.0252
SIP_S1_1	Male	Avg. night bout length (min.)	1	226.51	226.51	1.38	0.249
SIP_S1_10	Male	Avg. night bout length (min.)	1	251.982	251.982	4.31	0.0476
SIP_S1_2	Male	Avg. night bout length (min.)	1	33.9534	33.9534	0.49	0.4914
SIP_S1_3	Male	Avg. night bout length (min.)	1	13858.6	13858.6	0.9	0.3494
SIP_S1_4	Male	Avg. night bout length (min.)	1	210.673	210.673	2.02	0.166
SIP_S1_5	Male	Avg. night bout length (min.)	1	153.91	153.91	0.54	0.4683
SIP_S1_6	Male	Avg. night bout length (min.)	1	167.935	167.935	0.64	0.43
SIP_S1_7	Male	Avg. night bout length (min.)	1	336.765	336.765	3.21	0.0836
SIP_S1_8	Male	Avg. night bout length (min.)	1	73.1324	73.1324	0.27	0.6093
SIP_S1_9	Male	Avg. night bout length (min.)	1	1195.06	1195.06	9.89	0.0041
SIP_S2_1	Male	Avg. night bout length (min.)	1	25.689	25.689	2.18	0.1527
SIP_S2_10	Male	Avg. night bout length (min.)	1	77.4031	77.4031	8.37	0.0082
SIP_S2_2	Male	Avg. night bout length (min.)	1	6.1115	6.1115	0.95	0.3444
SIP_S2_3	Male	Avg. night bout length (min.)	1	327.098	327.098	1.01	0.3246
SIP_S2_4	Male	Avg. night bout length (min.)	1	63.1334	63.1334	0.36	0.5569
SIP_S2_5	Male	Avg. night bout length (min.)	1	0.9435	0.9435	0.04	0.8448
SIP_S2_6	Male	Avg. night bout length (min.)	1	0.6836	0.6836	0.01	0.9309
SIP_S2_7	Male	Avg. night bout length (min.)	1	128.864	128.864	2.75	0.1105
SIP_S2_8	Male	Avg. night bout length (min.)	1	152.543	152.543	6.53	0.0174
SIP_S2_9	Male	Avg. night bout length (min.)	1	226.533	226.533	7.48	0.0113
SIP_L1_1	Female	Day bout number	1	121.134	121.134	1.49	0.2317
SIP_L1_10	Female	Day bout number	1	53.9292	53.9292	1.15	0.2937
SIP_L1_2	Female	Day bout number	1	1.3531	1.3531	0.07	0.7903
SIP_L1_3	Female	Day bout number	1	1.4725	1.4725	0.02	0.8841
SIP_L1_4	Female	Day bout number	1	47.2926	47.2926	1.14	0.2943
SIP_L1_5	Female	Day bout number	1	114.755	114.755	5.57	0.0252
SIP_L1_6	Female	Day bout number	1	23.786	23.786	0.73	0.4008
SIP_L1_7	Female	Day bout number	1	6.3471	6.3471	0.1	0.7586
SIP_L1_8	Female	Day bout number	1	10.9782	10.9782	0.31	0.5822
SIP_L1_9	Female	Day bout number	1	3.6836	3.6836	0.15	0.7023
SIP_L2_1	Female	Day bout number	1	103.92	103.92	2.13	0.1546
SIP_L2_10	Female	Day bout number	1	133.389	133.389	1.74	0.1966
SIP_L2_2	Female	Day bout number	1	217.014	217.014	3.79	0.0609
SIP_L2_3	Female	Day bout number	1	17.0139	17.0139	0.33	0.5713
SIP_L2_4	Female	Day bout number	1	227.967	227.967	2.56	0.1204
SIP_L2_5	Female	Day bout number	1	179.822	179.822	4.29	0.0473
SIP_L2_6	Female	Day bout number	1	325.143	325.143	11.26	0.0022
SIP_L2_7	Female	Day bout number	1	333.681	333.681	8.64	0.0063
SIP_L2_8	Female	Day bout number	1	171.125	171.125	8.38	0.007
SIP_S1_1	Female	Day bout number	1	24.2881	24.2881	0.5	0.4837
SIP_S1_10	Female	Day bout number	1	398.097	398.097	4.39	0.045
SIP_S1_2	Female	Day bout number	1	11.2813	11.2813	0.13	0.7202
SIP_S1_3	Female	Day bout number	1	1.4075	1.4075	0.01	0.9044
SIP_S1_4	Female	Day bout number	1	17.5035	17.5035	0.3	0.5854
SIP_S1_5	Female	Day bout number	1	1112.31	1112.31	30.9	<.0001
SIP_S1_6	Female	Day bout number	1	1254.17	1254.17	22.14	<.0001
SIP_S1_7	Female	Day bout number	1	6.4201	6.4201	0.08	0.7747
SIP_S1_8	Female	Day bout number	1	150.222	150.222	2.37	0.1345
SIP_S1_9	Female	Day bout number	1	94.8148	94.8148	1.42	0.2427
SIP_S2_1	Female	Day bout number	1	42.7812	42.7812	1.53	0.2259
SIP_S2_10	Female	Day bout number	1	65.4952	65.4952	0.89	0.3552
SIP_S2_2	Female	Day bout number	1	328.776	328.776	6.72	0.0148
SIP_S2_3	Female	Day bout number	1	129.878	129.878	2.69	0.1115
SIP_S2_4	Female	Day bout number	1	1.3798	1.3798	0.04	0.8459
SIP_S2_5	Female	Day bout number	1	850.671	850.671	32.38	<.0001
SIP_S2_6	Female	Day bout number	1	171.829	171.829	2.98	0.0949
SIP_S2_7	Female	Day bout number	1	0.3836	0.3836	0.01	0.932
SIP_S2_8	Female	Day bout number	1	2.8389	2.8389	0.04	0.846
SIP_S2_9	Female	Day bout number	1	6.8448	6.8448	0.15	0.7
SIP_L1_1	Male	Day bout number	1	365.528	365.528	20.85	<.0001
SIP_L1_10	Male	Day bout number	1	235.251	235.251	8.86	0.006
SIP_L1_2	Male	Day bout number	1	0.0035	0.0035	0	0.99
SIP_L1_3	Male	Day bout number	1	0.2189	0.2189	0.02	0.9002
SIP_L1_4	Male	Day bout number	1	92.3711	92.3711	2.71	0.1102
SIP_L1_5	Male	Day bout number	1	6.1554	6.1554	0.28	0.6024
SIP_L1_6	Male	Day bout number	1	67.3742	67.3742	2.84	0.1025
SIP_L1_7	Male	Day bout number	1	0.0868	0.0868	0	0.9538
SIP_L1_8	Male	Day bout number	1	5.0412	5.0412	0.24	0.6303
SIP_L1_9	Male	Day bout number	1	1.3889	1.3889	0.04	0.8369
SIP_L2_1	Male	Day bout number	1	12.9201	12.9201	0.23	0.6359
SIP_L2_10	Male	Day bout number	1	38.2813	38.2813	0.93	0.3421
SIP_L2_2	Male	Day bout number	1	12.0868	12.0868	0.28	0.5984
SIP_L2_3	Male	Day bout number	1	128.209	128.209	1.16	0.2899
SIP_L2_4	Male	Day bout number	1	566.226	566.226	18.01	0.0002
SIP_L2_5	Male	Day bout number	1	570.561	570.561	12.2	0.0016
SIP_L2_6	Male	Day bout number	1	9.0313	9.0313	0.27	0.6098
SIP_L2_7	Male	Day bout number	1	595.125	595.125	20.65	<.0001
SIP_L2_8	Male	Day bout number	1	44.3368	44.3368	0.71	0.4048
SIP_S1_1	Male	Day bout number	1	250.434	250.434	6.98	0.0132
SIP_S1_10	Male	Day bout number	1	103.293	103.293	2.89	0.1
SIP_S1_2	Male	Day bout number	1	31.4427	31.4427	0.39	0.5359
SIP_S1_3	Male	Day bout number	1	0.4201	0.4201	0	0.9449
SIP_S1_4	Male	Day bout number	1	247.531	247.531	9.97	0.0036
SIP_S1_5	Male	Day bout number	1	161.804	161.804	2.6	0.1183
SIP_S1_6	Male	Day bout number	1	130.681	130.681	1.68	0.2047
SIP_S1_7	Male	Day bout number	1	131.734	131.734	3.06	0.0908
SIP_S1_8	Male	Day bout number	1	401.187	401.187	7.95	0.0086
SIP_S1_9	Male	Day bout number	1	129.515	129.515	2.25	0.1452
SIP_S2_1	Male	Day bout number	1	12.0868	12.0868	0.26	0.6143
SIP_S2_10	Male	Day bout number	1	419.029	419.029	11.58	0.002
SIP_S2_2	Male	Day bout number	1	0.7259	0.7259	0.01	0.9157
SIP_S2_3	Male	Day bout number	1	77.0868	77.0868	2.06	0.1617
SIP_S2_4	Male	Day bout number	1	0.7076	0.7076	0.02	0.8935
SIP_S2_5	Male	Day bout number	1	21.125	21.125	0.61	0.4414
SIP_S2_6	Male	Day bout number	1	125.347	125.347	4.12	0.0514
SIP_S2_7	Male	Day bout number	1	285.588	285.588	11.46	0.0021
SIP_S2_8	Male	Day bout number	1	108.781	108.781	2.96	0.0957
SIP_S2_9	Male	Day bout number	1	261.188	261.188	5.07	0.0321
SIP_L1_1	Female	Night bout number	1	551.704	551.704	10.62	0.0029
SIP_L1_10	Female	Night bout number	1	42.4339	42.4339	0.85	0.3642
SIP_L1_2	Female	Night bout number	1	819.792	819.792	22.57	<.0001
SIP_L1_3	Female	Night bout number	1	206.824	206.824	5.19	0.0312
SIP_L1_4	Female	Night bout number	1	2.3148	2.3148	0.03	0.8627
SIP_L1_5	Female	Night bout number	1	60.4562	60.4562	1.09	0.3049
SIP_L1_6	Female	Night bout number	1	84.0167	84.0167	1.56	0.2235
SIP_L1_7	Female	Night bout number	1	109.128	109.128	1.69	0.2042
SIP_L1_8	Female	Night bout number	1	241.92	241.92	3.07	0.0912
SIP_L1_9	Female	Night bout number	1	41.9058	41.9058	0.83	0.3701
SIP_L2_1	Female	Night bout number	1	132.031	132.031	4.46	0.0431
SIP_L2_10	Female	Night bout number	1	47.5313	47.5313	1.23	0.2765
SIP_L2_2	Female	Night bout number	1	294.031	294.031	5.22	0.0295
SIP_L2_3	Female	Night bout number	1	211.837	211.837	4.09	0.0521
SIP_L2_4	Female	Night bout number	1	100.8	100.8	1.88	0.1814
SIP_L2_5	Female	Night bout number	1	827.556	827.556	23.88	<.0001
SIP_L2_6	Female	Night bout number	1	139.839	139.839	8.21	0.0077
SIP_L2_7	Female	Night bout number	1	129.337	129.337	4.08	0.0524
SIP_L2_8	Female	Night bout number	1	111.254	111.254	3.09	0.0892
SIP_S1_1	Female	Night bout number	1	262.965	262.965	5.76	0.0232
SIP_S1_10	Female	Night bout number	1	0.0651	0.0651	0	0.9782
SIP_S1_2	Female	Night bout number	1	83.4201	83.4201	1.4	0.2458
SIP_S1_3	Female	Night bout number	1	1.4631	1.4631	0.03	0.8629
SIP_S1_4	Female	Night bout number	1	103.92	103.92	5.25	0.0292
SIP_S1_5	Female	Night bout number	1	37.1032	37.1032	1.38	0.2497
SIP_S1_6	Female	Night bout number	1	59.5868	59.5868	1.99	0.1682
SIP_S1_7	Female	Night bout number	1	40.5	40.5	1.38	0.2487
SIP_S1_8	Female	Night bout number	1	62.3472	62.3472	2.27	0.1427
SIP_S1_9	Female	Night bout number	1	23.7037	23.7037	0.62	0.4361
SIP_S2_1	Female	Night bout number	1	177.347	177.347	7.15	0.012
SIP_S2_10	Female	Night bout number	1	55.6046	55.6046	0.71	0.4077
SIP_S2_2	Female	Night bout number	1	54.3108	54.3108	2.36	0.1353
SIP_S2_3	Female	Night bout number	1	1.2821	1.2821	0.03	0.8653
SIP_S2_4	Female	Night bout number	1	2.0353	2.0353	0.06	0.8108
SIP_S2_5	Female	Night bout number	1	238.194	238.194	4.24	0.0496
SIP_S2_6	Female	Night bout number	1	16.907	16.907	0.46	0.5016
SIP_S2_7	Female	Night bout number	1	65.8639	65.8639	1.76	0.1962
SIP_S2_8	Female	Night bout number	1	0.033	0.033	0	0.97
SIP_S2_9	Female	Night bout number	1	0.5391	0.5391	0.01	0.9127
SIP_L1_1	Male	Night bout number	1	947.127	947.127	36.54	<.0001
SIP_L1_10	Male	Night bout number	1	328.306	328.306	5.74	0.0235
SIP_L1_2	Male	Night bout number	1	501.389	501.389	12.16	0.0015
SIP_L1_3	Male	Night bout number	1	0.0708	0.0708	0	0.9673
SIP_L1_4	Male	Night bout number	1	94.3876	94.3876	3.12	0.0876
SIP_L1_5	Male	Night bout number	1	0.2409	0.2409	0.01	0.9389
SIP_L1_6	Male	Night bout number	1	26.8961	26.8961	0.84	0.3677
SIP_L1_7	Male	Night bout number	1	52.5313	52.5313	1.33	0.2587
SIP_L1_8	Male	Night bout number	1	31.0108	31.0108	0.8	0.3788
SIP_L1_9	Male	Night bout number	1	4.7535	4.7535	0.24	0.6266
SIP_L2_1	Male	Night bout number	1	360.014	360.014	9.89	0.0037
SIP_L2_10	Male	Night bout number	1	520.031	520.031	12.19	0.0015
SIP_L2_2	Male	Night bout number	1	249.389	249.389	12.87	0.0012
SIP_L2_3	Male	Night bout number	1	123.613	123.613	2.76	0.1072
SIP_L2_4	Male	Night bout number	1	929.633	929.633	26.16	<.0001
SIP_L2_5	Male	Night bout number	1	509.692	509.692	10.96	0.0025
SIP_L2_6	Male	Night bout number	1	296.056	296.056	6.8	0.0141
SIP_L2_7	Male	Night bout number	1	906.67	906.67	18.26	0.0002
SIP_L2_8	Male	Night bout number	1	280.056	280.056	5.03	0.0324
SIP_S1_1	Male	Night bout number	1	85.8066	85.8066	4.15	0.0509
SIP_S1_10	Male	Night bout number	1	98.4037	98.4037	3.77	0.0624
SIP_S1_2	Male	Night bout number	1	36.9993	36.9993	1.26	0.2701
SIP_S1_3	Male	Night bout number	1	10.8889	10.8889	0.22	0.6395
SIP_S1_4	Male	Night bout number	1	0.1701	0.1701	0.01	0.9211
SIP_S1_5	Male	Night bout number	1	25.2751	25.2751	1.06	0.3125
SIP_S1_6	Male	Night bout number	1	137.504	137.504	6.06	0.0198
SIP_S1_7	Male	Night bout number	1	98.3327	98.3327	6.15	0.0192
SIP_S1_8	Male	Night bout number	1	33.4232	33.4232	0.78	0.384
SIP_S1_9	Male	Night bout number	1	87.837	87.837	2.03	0.1648
SIP_S2_1	Male	Night bout number	1	210.125	210.125	5.49	0.0259
SIP_S2_10	Male	Night bout number	1	27.7038	27.7038	1.1	0.3031
SIP_S2_2	Male	Night bout number	1	35.5704	35.5704	1.22	0.2793
SIP_S2_3	Male	Night bout number	1	7.6701	7.6701	0.56	0.4596
SIP_S2_4	Male	Night bout number	1	38.9962	38.9962	1.4	0.247
SIP_S2_5	Male	Night bout number	1	49.1701	49.1701	1.84	0.1846
SIP_S2_6	Male	Night bout number	1	12.5	12.5	0.24	0.6292
SIP_S2_7	Male	Night bout number	1	7.2899	7.2899	0.45	0.5074
SIP_S2_8	Male	Night bout number	1	27.5035	27.5035	0.8	0.3779
SIP_S2_9	Male	Night bout number	1	236.446	236.446	5.04	0.0326
SIP_L1_1	Female	Sleep latency (min.)	1	3479.99	3479.99	1.08	0.3069
SIP_L1_10	Female	Sleep latency (min.)	1	3491.72	3491.72	1.8	0.1911
SIP_L1_2	Female	Sleep latency (min.)	1	2481.36	2481.36	4.91	0.0346
SIP_L1_3	Female	Sleep latency (min.)	1	18.5986	18.5986	0.15	0.7015
SIP_L1_4	Female	Sleep latency (min.)	1	1040.37	1040.37	2.36	0.1357
SIP_L1_5	Female	Sleep latency (min.)	1	2.5845	2.5845	0	0.9459
SIP_L1_6	Female	Sleep latency (min.)	1	26.6667	26.6667	0.2	0.6585
SIP_L1_7	Female	Sleep latency (min.)	1	7.8305	7.8305	0.03	0.858
SIP_L1_8	Female	Sleep latency (min.)	1	6083.44	6083.44	2.58	0.1199
SIP_L1_9	Female	Sleep latency (min.)	1	360.288	360.288	1.11	0.3012
SIP_L2_1	Female	Sleep latency (min.)	1	249.389	249.389	1.42	0.2435
SIP_L2_10	Female	Sleep latency (min.)	1	284.014	284.014	2.92	0.0979
SIP_L2_2	Female	Sleep latency (min.)	1	687.587	687.587	9.94	0.0037
SIP_L2_3	Female	Sleep latency (min.)	1	56.8889	56.8889	1.43	0.2407
SIP_L2_4	Female	Sleep latency (min.)	1	36.3441	36.3441	1.63	0.2122
SIP_L2_5	Female	Sleep latency (min.)	1	100.026	100.026	2.12	0.1565
SIP_L2_6	Female	Sleep latency (min.)	1	30.8818	30.8818	0.36	0.5557
SIP_L2_7	Female	Sleep latency (min.)	1	0.125	0.125	0	0.9713
SIP_L2_8	Female	Sleep latency (min.)	1	366.753	366.753	14.73	0.0006
SIP_S1_1	Female	Sleep latency (min.)	1	42783.6	42783.6	4.37	0.0457
SIP_S1_10	Female	Sleep latency (min.)	1	14233.6	14233.6	1.18	0.2865
SIP_S1_2	Female	Sleep latency (min.)	1	53655.4	53655.4	4.41	0.0442
SIP_S1_3	Female	Sleep latency (min.)	1	91.7038	91.7038	0.05	0.8204
SIP_S1_4	Female	Sleep latency (min.)	1	820.125	820.125	1.41	0.2448
SIP_S1_5	Female	Sleep latency (min.)	1	632.306	632.306	1.57	0.2201
SIP_S1_6	Female	Sleep latency (min.)	1	110.014	110.014	0.03	0.8731
SIP_S1_7	Female	Sleep latency (min.)	1	17719	17719	4.79	0.0366
SIP_S1_8	Female	Sleep latency (min.)	1	9191.42	9191.42	3.41	0.0747
SIP_S1_9	Female	Sleep latency (min.)	1	694.404	694.404	0.2	0.6582
SIP_S2_1	Female	Sleep latency (min.)	1	202831	202831	7.51	0.0103
SIP_S2_10	Female	Sleep latency (min.)	1	111627	111627	3.01	0.0945
SIP_S2_2	Female	Sleep latency (min.)	1	67595.5	67595.5	1.53	0.2254
SIP_S2_3	Female	Sleep latency (min.)	1	35854.3	35854.3	0.77	0.388
SIP_S2_4	Female	Sleep latency (min.)	1	895.531	895.531	0.02	0.8971
SIP_S2_5	Female	Sleep latency (min.)	1	180482	180482	5.58	0.026
SIP_S2_6	Female	Sleep latency (min.)	1	30383.2	30383.2	0.49	0.4894
SIP_S2_7	Female	Sleep latency (min.)	1	250767	250767	6.33	0.0181
SIP_S2_8	Female	Sleep latency (min.)	1	4230.62	4230.62	0.09	0.7719
SIP_S2_9	Female	Sleep latency (min.)	1	5170	5170	0.14	0.7078
SIP_L1_1	Male	Sleep latency (min.)	1	189.523	189.523	6.51	0.0167
SIP_L1_10	Male	Sleep latency (min.)	1	313.736	313.736	4.17	0.0507
SIP_L1_2	Male	Sleep latency (min.)	1	329.389	329.389	5.36	0.0276
SIP_L1_3	Male	Sleep latency (min.)	1	1.3728	1.3728	0.03	0.8574
SIP_L1_4	Male	Sleep latency (min.)	1	3.1601	3.1601	0.03	0.8658
SIP_L1_5	Male	Sleep latency (min.)	1	0.052	0.052	0	0.9755
SIP_L1_6	Male	Sleep latency (min.)	1	96.0468	96.0468	2.5	0.125
SIP_L1_7	Male	Sleep latency (min.)	1	61.4201	61.4201	1.06	0.3117
SIP_L1_8	Male	Sleep latency (min.)	1	137.654	137.654	2.3	0.1405
SIP_L1_9	Male	Sleep latency (min.)	1	12.5	12.5	0.14	0.7094
SIP_L2_1	Male	Sleep latency (min.)	1	566.722	566.722	7.41	0.0107
SIP_L2_10	Male	Sleep latency (min.)	1	960.681	960.681	6.76	0.0143
SIP_L2_2	Male	Sleep latency (min.)	1	35.4201	35.4201	0.13	0.7228
SIP_L2_3	Male	Sleep latency (min.)	1	1.6165	1.6165	0.05	0.8246
SIP_L2_4	Male	Sleep latency (min.)	1	1149.07	1149.07	12.53	0.0014
SIP_L2_5	Male	Sleep latency (min.)	1	551.522	551.522	18.68	0.0002
SIP_L2_6	Male	Sleep latency (min.)	1	83.4201	83.4201	0.38	0.5399
SIP_L2_7	Male	Sleep latency (min.)	1	2010.84	2010.84	11.22	0.0022
SIP_L2_8	Male	Sleep latency (min.)	1	1.0035	1.0035	0.01	0.9083
SIP_S1_1	Male	Sleep latency (min.)	1	13599	13599	5.93	0.0212
SIP_S1_10	Male	Sleep latency (min.)	1	85938.8	85938.8	3.45	0.0739
SIP_S1_2	Male	Sleep latency (min.)	1	109587	109587	3.16	0.0859
SIP_S1_3	Male	Sleep latency (min.)	1	62010.7	62010.7	4.35	0.0456
SIP_S1_4	Male	Sleep latency (min.)	1	17282.5	17282.5	2.16	0.1517
SIP_S1_5	Male	Sleep latency (min.)	1	31198.5	31198.5	3.07	0.091
SIP_S1_6	Male	Sleep latency (min.)	1	79069.4	79069.4	2.65	0.1141
SIP_S1_7	Male	Sleep latency (min.)	1	81431.3	81431.3	3.44	0.0738
SIP_S1_8	Male	Sleep latency (min.)	1	541.225	541.225	0.04	0.8482
SIP_S1_9	Male	Sleep latency (min.)	1	281236	281236	7.47	0.0107
SIP_S2_1	Male	Sleep latency (min.)	1	267120	267120	5.19	0.03
SIP_S2_10	Male	Sleep latency (min.)	1	23237.6	23237.6	0.49	0.4909
SIP_S2_2	Male	Sleep latency (min.)	1	43981.2	43981.2	0.86	0.3617
SIP_S2_3	Male	Sleep latency (min.)	1	1638.78	1638.78	0.04	0.8513
SIP_S2_4	Male	Sleep latency (min.)	1	4379.34	4379.34	0.08	0.7792
SIP_S2_5	Male	Sleep latency (min.)	1	74048.3	74048.3	1.48	0.2336
SIP_S2_6	Male	Sleep latency (min.)	1	72548.8	72548.8	1.35	0.2547
SIP_S2_7	Male	Sleep latency (min.)	1	36484.1	36484.1	0.87	0.3585
SIP_S2_8	Male	Sleep latency (min.)	1	2862.72	2862.72	0.05	0.8229
SIP_S2_9	Male	Sleep latency (min.)	1	71545.9	71545.9	1.46	0.2372
SIP_L1_1	Female	Night sleep (min.)	1	123261	123261	9.92	0.0038
SIP_L1_10	Female	Night sleep (min.)	1	22294.3	22294.3	0.97	0.3328
SIP_L1_2	Female	Night sleep (min.)	1	168502	168502	23.24	<.0001
SIP_L1_3	Female	Night sleep (min.)	1	5259.87	5259.87	3.94	0.0579
SIP_L1_4	Female	Night sleep (min.)	1	16724.5	16724.5	1.2	0.282
SIP_L1_5	Female	Night sleep (min.)	1	9010.47	9010.47	0.91	0.349
SIP_L1_6	Female	Night sleep (min.)	1	5453.07	5453.07	1.78	0.1939
SIP_L1_7	Female	Night sleep (min.)	1	23830.3	23830.3	2.16	0.153
SIP_L1_8	Female	Night sleep (min.)	1	172738	172738	8.39	0.0074
SIP_L1_9	Female	Night sleep (min.)	1	19.9339	19.9339	0	0.9644
SIP_L2_1	Female	Night sleep (min.)	1	7574.75	7574.75	5.7	0.0235
SIP_L2_10	Female	Night sleep (min.)	1	9522	9522	2.2	0.1481
SIP_L2_2	Female	Night sleep (min.)	1	12773.3	12773.3	3.46	0.0729
SIP_L2_3	Female	Night sleep (min.)	1	6498	6498	1.33	0.258
SIP_L2_4	Female	Night sleep (min.)	1	1955.19	1955.19	1.21	0.2809
SIP_L2_5	Female	Night sleep (min.)	1	23431.2	23431.2	21.1	<.0001
SIP_L2_6	Female	Night sleep (min.)	1	4774.41	4774.41	7.95	0.0086
SIP_L2_7	Female	Night sleep (min.)	1	4035.01	4035.01	4.34	0.0459
SIP_L2_8	Female	Night sleep (min.)	1	9.3889	9.3889	0.01	0.9359
SIP_S1_1	Female	Night sleep (min.)	1	266.671	266.671	0.01	0.915
SIP_S1_10	Female	Night sleep (min.)	1	458.854	458.854	0.03	0.8604
SIP_S1_2	Female	Night sleep (min.)	1	16759.8	16759.8	0.88	0.3547
SIP_S1_3	Female	Night sleep (min.)	1	1512.31	1512.31	0.1	0.7514
SIP_S1_4	Female	Night sleep (min.)	1	10816.8	10816.8	1.05	0.314
SIP_S1_5	Female	Night sleep (min.)	1	70798.1	70798.1	10.88	0.0027
SIP_S1_6	Female	Night sleep (min.)	1	600.889	600.889	0.03	0.8582
SIP_S1_7	Female	Night sleep (min.)	1	10260.3	10260.3	0.53	0.4725
SIP_S1_8	Female	Night sleep (min.)	1	174394	174394	10.93	0.0025
SIP_S1_9	Female	Night sleep (min.)	1	30507	30507	2.5	0.125
SIP_S2_1	Female	Night sleep (min.)	1	11858	11858	6.23	0.0183
SIP_S2_10	Female	Night sleep (min.)	1	14737.5	14737.5	0.89	0.3535
SIP_S2_2	Female	Night sleep (min.)	1	26282.7	26282.7	1.81	0.189
SIP_S2_3	Female	Night sleep (min.)	1	142.686	142.686	0.03	0.8675
SIP_S2_4	Female	Night sleep (min.)	1	49.0713	49.0713	0	0.9539
SIP_S2_5	Female	Night sleep (min.)	1	34370	34370	4.68	0.0399
SIP_S2_6	Female	Night sleep (min.)	1	314.363	314.363	0.03	0.8611
SIP_S2_7	Female	Night sleep (min.)	1	1407.11	1407.11	0.38	0.5427
SIP_S2_8	Female	Night sleep (min.)	1	252.763	252.763	0.12	0.7322
SIP_S2_9	Female	Night sleep (min.)	1	1327.75	1327.75	0.43	0.5173
SIP_L1_1	Male	Night sleep (min.)	1	68031.6	68031.6	11.05	0.0026
SIP_L1_10	Male	Night sleep (min.)	1	22652.7	22652.7	3.96	0.0563
SIP_L1_2	Male	Night sleep (min.)	1	35267.3	35267.3	13.16	0.0011
SIP_L1_3	Male	Night sleep (min.)	1	727.392	727.392	0.3	0.5895
SIP_L1_4	Male	Night sleep (min.)	1	5979.69	5979.69	2.19	0.1496
SIP_L1_5	Male	Night sleep (min.)	1	156.387	156.387	0.03	0.8545
SIP_L1_6	Male	Night sleep (min.)	1	1185.6	1185.6	0.58	0.4524
SIP_L1_7	Male	Night sleep (min.)	1	1250	1250	0.66	0.4243
SIP_L1_8	Male	Night sleep (min.)	1	552.249	552.249	0.18	0.678
SIP_L1_9	Male	Night sleep (min.)	1	5556.34	5556.34	1.42	0.2421
SIP_L2_1	Male	Night sleep (min.)	1	41808.7	41808.7	6.02	0.0201
SIP_L2_10	Male	Night sleep (min.)	1	72105	72105	13.12	0.0011
SIP_L2_2	Male	Night sleep (min.)	1	1204.59	1204.59	0.19	0.6688
SIP_L2_3	Male	Night sleep (min.)	1	18023.7	18023.7	3.72	0.0634
SIP_L2_4	Male	Night sleep (min.)	1	51418.8	51418.8	24.37	<.0001
SIP_L2_5	Male	Night sleep (min.)	1	65334	65334	13.05	0.0011
SIP_L2_6	Male	Night sleep (min.)	1	38387.6	38387.6	5.85	0.0219
SIP_L2_7	Male	Night sleep (min.)	1	14878.1	14878.1	1.3	0.2636
SIP_L2_8	Male	Night sleep (min.)	1	11425.7	11425.7	2.3	0.1398
SIP_S1_1	Male	Night sleep (min.)	1	14978	14978	0.87	0.3599
SIP_S1_10	Male	Night sleep (min.)	1	77792.2	77792.2	7.49	0.0107
SIP_S1_2	Male	Night sleep (min.)	1	7612.99	7612.99	0.75	0.3951
SIP_S1_3	Male	Night sleep (min.)	1	86666.7	86666.7	5.95	0.0209
SIP_S1_4	Male	Night sleep (min.)	1	41088.9	41088.9	3.87	0.0586
SIP_S1_5	Male	Night sleep (min.)	1	557.137	557.137	0.04	0.8476
SIP_S1_6	Male	Night sleep (min.)	1	64920.1	64920.1	5.25	0.0291
SIP_S1_7	Male	Night sleep (min.)	1	66206.1	66206.1	7.31	0.0114
SIP_S1_8	Male	Night sleep (min.)	1	8968.7	8968.7	0.45	0.5087
SIP_S1_9	Male	Night sleep (min.)	1	199485	199485	10.69	0.0029
SIP_S2_1	Male	Night sleep (min.)	1	28401.4	28401.4	3.65	0.0658
SIP_S2_10	Male	Night sleep (min.)	1	11888.1	11888.1	2.84	0.1026
SIP_S2_2	Male	Night sleep (min.)	1	1100.09	1100.09	0.45	0.5066
SIP_S2_3	Male	Night sleep (min.)	1	8734.01	8734.01	1.52	0.2273
SIP_S2_4	Male	Night sleep (min.)	1	4353.81	4353.81	0.57	0.4568
SIP_S2_5	Male	Night sleep (min.)	1	11175.1	11175.1	1.48	0.2326
SIP_S2_6	Male	Night sleep (min.)	1	4544.22	4544.22	0.23	0.6315
SIP_S2_7	Male	Night sleep (min.)	1	9031.92	9031.92	1.33	0.2585
SIP_S2_8	Male	Night sleep (min.)	1	22684.5	22684.5	2.9	0.0991
SIP_S2_9	Male	Night sleep (min.)	1	77938.5	77938.5	8.24	0.0076
SIP_L1_1	Female	Waking activity (cts/min.)	1	0.0549	0.0549	0.52	0.4768
SIP_L1_10	Female	Waking activity (cts/min.)	1	0.3369	0.3369	2.84	0.1032
SIP_L1_2	Female	Waking activity (cts/min.)	1	0.3798	0.3798	3.16	0.0857
SIP_L1_3	Female	Waking activity (cts/min.)	1	0.5343	0.5343	8.47	0.0073
SIP_L1_4	Female	Waking activity (cts/min.)	1	0.0089	0.0089	0.02	0.9026
SIP_L1_5	Female	Waking activity (cts/min.)	1	0.7257	0.7257	3.45	0.0736
SIP_L1_6	Female	Waking activity (cts/min.)	1	0.0377	0.0377	0.25	0.6209
SIP_L1_7	Female	Waking activity (cts/min.)	1	0.0242	0.0242	0.14	0.7077
SIP_L1_8	Female	Waking activity (cts/min.)	1	0.6212	0.6212	6.53	0.0166
SIP_L1_9	Female	Waking activity (cts/min.)	1	0.2018	0.2018	1.35	0.2552
SIP_L2_1	Female	Waking activity (cts/min.)	1	0.0013	0.0013	0.02	0.8874
SIP_L2_10	Female	Waking activity (cts/min.)	1	2.6464	2.6464	2.59	0.118
SIP_L2_2	Female	Waking activity (cts/min.)	1	0.0003	0.0003	0	0.9576
SIP_L2_3	Female	Waking activity (cts/min.)	1	1.2792	1.2792	5.08	0.0317
SIP_L2_4	Female	Waking activity (cts/min.)	1	0.4172	0.4172	0.63	0.4339
SIP_L2_5	Female	Waking activity (cts/min.)	1	0.1043	0.1043	1.27	0.2695
SIP_L2_6	Female	Waking activity (cts/min.)	1	0.2401	0.2401	0.93	0.3418
SIP_L2_7	Female	Waking activity (cts/min.)	1	0.1129	0.1129	0.28	0.5981
SIP_L2_8	Female	Waking activity (cts/min.)	1	0.489	0.489	0.85	0.3626
SIP_S1_1	Female	Waking activity (cts/min.)	1	0.2909	0.2909	2.46	0.1278
SIP_S1_10	Female	Waking activity (cts/min.)	1	0.0463	0.0463	0.59	0.448
SIP_S1_2	Female	Waking activity (cts/min.)	1	0.5404	0.5404	4.23	0.0484
SIP_S1_3	Female	Waking activity (cts/min.)	1	0.0605	0.0605	0.75	0.3945
SIP_S1_4	Female	Waking activity (cts/min.)	1	0.1784	0.1784	2.68	0.112
SIP_S1_5	Female	Waking activity (cts/min.)	1	0.0008	0.0008	0.02	0.8936
SIP_S1_6	Female	Waking activity (cts/min.)	1	0.1634	0.1634	3.28	0.08
SIP_S1_7	Female	Waking activity (cts/min.)	1	0.0134	0.0134	0.12	0.7302
SIP_S1_8	Female	Waking activity (cts/min.)	1	0.142	0.142	1.34	0.2561
SIP_S1_9	Female	Waking activity (cts/min.)	1	0.0851	0.0851	1.85	0.1844
SIP_S2_1	Female	Waking activity (cts/min.)	1	0.4425	0.4425	2.39	0.1324
SIP_S2_10	Female	Waking activity (cts/min.)	1	0.805	0.805	4.81	0.0374
SIP_S2_2	Female	Waking activity (cts/min.)	1	0.7582	0.7582	3.24	0.0823
SIP_S2_3	Female	Waking activity (cts/min.)	1	0.0391	0.0391	0.15	0.7016
SIP_S2_4	Female	Waking activity (cts/min.)	1	0.6087	0.6087	1.39	0.2482
SIP_S2_5	Female	Waking activity (cts/min.)	1	2.3058	2.3058	17.01	0.0003
SIP_S2_6	Female	Waking activity (cts/min.)	1	0.0011	0.0011	0	0.9545
SIP_S2_7	Female	Waking activity (cts/min.)	1	1.96	1.96	12.7	0.0014
SIP_S2_8	Female	Waking activity (cts/min.)	1	0.7546	0.7546	4.68	0.0389
SIP_S2_9	Female	Waking activity (cts/min.)	1	0.0518	0.0518	0.18	0.6709
SIP_L1_1	Male	Waking activity (cts/min.)	1	0.297	0.297	2.25	0.1452
SIP_L1_10	Male	Waking activity (cts/min.)	1	0.3582	0.3582	2.32	0.1393
SIP_L1_2	Male	Waking activity (cts/min.)	1	0.0012	0.0012	0.01	0.9293
SIP_L1_3	Male	Waking activity (cts/min.)	1	0.0674	0.0674	0.24	0.6271
SIP_L1_4	Male	Waking activity (cts/min.)	1	0.0636	0.0636	0.22	0.6454
SIP_L1_5	Male	Waking activity (cts/min.)	1	0.0912	0.0912	0.39	0.5372
SIP_L1_6	Male	Waking activity (cts/min.)	1	0.7583	0.7583	1.62	0.2131
SIP_L1_7	Male	Waking activity (cts/min.)	1	0.3213	0.3213	3.07	0.0898
SIP_L1_8	Male	Waking activity (cts/min.)	1	1.0492	1.0492	2.77	0.107
SIP_L1_9	Male	Waking activity (cts/min.)	1	2.5015	2.5015	4.24	0.0484
SIP_L2_1	Male	Waking activity (cts/min.)	1	0.1446	0.1446	1.17	0.2889
SIP_L2_10	Male	Waking activity (cts/min.)	1	0.7434	0.7434	5.45	0.0265
SIP_L2_2	Male	Waking activity (cts/min.)	1	1.2751	1.2751	8.1	0.0079
SIP_L2_3	Male	Waking activity (cts/min.)	1	4.0539	4.0539	4.64	0.0396
SIP_L2_4	Male	Waking activity (cts/min.)	1	4.6935	4.6935	6.41	0.0172
SIP_L2_5	Male	Waking activity (cts/min.)	1	1.1145	1.1145	8.7	0.0062
SIP_L2_6	Male	Waking activity (cts/min.)	1	0.2102	0.2102	2.14	0.1538
SIP_L2_7	Male	Waking activity (cts/min.)	1	0.815	0.815	9.8	0.0039
SIP_L2_8	Male	Waking activity (cts/min.)	1	0.9681	0.9681	16.19	0.0004
SIP_S1_1	Male	Waking activity (cts/min.)	1	0.123	0.123	0.63	0.4339
SIP_S1_10	Male	Waking activity (cts/min.)	1	0.1344	0.1344	1.98	0.1701
SIP_S1_2	Male	Waking activity (cts/min.)	1	0.6964	0.6964	3.03	0.0924
SIP_S1_3	Male	Waking activity (cts/min.)	1	0.002	0.002	0.01	0.9343
SIP_S1_4	Male	Waking activity (cts/min.)	1	0.7354	0.7354	6.77	0.0143
SIP_S1_5	Male	Waking activity (cts/min.)	1	0.288	0.288	4.59	0.0414
SIP_S1_6	Male	Waking activity (cts/min.)	1	0.0112	0.0112	0.08	0.7857
SIP_S1_7	Male	Waking activity (cts/min.)	1	0.0681	0.0681	0.15	0.7024
SIP_S1_8	Male	Waking activity (cts/min.)	1	0.1946	0.1946	1.71	0.2006
SIP_S1_9	Male	Waking activity (cts/min.)	1	0.8135	0.8135	5.92	0.0216
SIP_S2_1	Male	Waking activity (cts/min.)	1	2.3481	2.3481	14.28	0.0007
SIP_S2_10	Male	Waking activity (cts/min.)	1	1.2802	1.2802	5.64	0.0244
SIP_S2_2	Male	Waking activity (cts/min.)	1	2.59	2.59	13.1	0.0012
SIP_S2_3	Male	Waking activity (cts/min.)	1	0.8604	0.8604	2.51	0.1236
SIP_S2_4	Male	Waking activity (cts/min.)	1	2.0239	2.0239	4.68	0.0395
SIP_S2_5	Male	Waking activity (cts/min.)	1	0.0153	0.0153	0.04	0.8377
SIP_S2_6	Male	Waking activity (cts/min.)	1	0.0096	0.0096	0.03	0.8706
SIP_S2_7	Male	Waking activity (cts/min.)	1	0.8772	0.8772	5.04	0.0329
SIP_S2_8	Male	Waking activity (cts/min.)	1	1.2354	1.2354	5.08	0.0316
SIP_S2_9	Male	Waking activity (cts/min.)	1	0.6712	0.6712	2.32	0.1388
