# Supplementary material for: Short-Term Memory Deficits in the SLEEP Inbred Panel
Source: Clocks Sleep. 2019 Oct 28;1(4):471–88. doi: 10.3390/clockssleep1040036 (PMC7318870; doi:10.3390/clockssleep1040036)
Supplement: Supplementary file 1 [file clockssleep-01-00036-s001.zip › Table_S1.xlsx]

## Sheet: Table_S1
Line	Sex	Sleep_type	APS_Block_4_score	PER_Water	PER_Quinine
DGRP_373	Female	control	2.8	0.5	0.6
DGRP_373	Male	control	2.8	0.6	0.3
SIP_L1_1	Female	long	1.8	0.4	0.3
SIP_L1_1	Male	long	1.6	0.5	0.4
SIP_L1_10	Female	long	1.2	0.6	0.4
SIP_L1_10	Male	long	1.2	0.7	0.5
SIP_L1_2	Female	long	1	0.7	0.3
SIP_L1_2	Male	long	1.6	0.8	0.2
SIP_L1_3	Female	long	0.8	0.5	0.4
SIP_L1_3	Male	long	1.8	0.5	0.4
SIP_L1_4	Female	long	1.8	0.5	0.5
SIP_L1_4	Male	long	1	0.9	0.3
SIP_L1_5	Female	long	1.2	0.6	0.3
SIP_L1_5	Male	long	2	0.8	0.2
SIP_L1_6	Female	long	1.6	0.6	0.4
SIP_L1_6	Male	long	1.4	0.6	0.1
SIP_L1_7	Female	long	1.2	0.5	0.2
SIP_L1_7	Male	long	1.4	0.5	0.4
SIP_L1_8	Female	long	1.4	0.4	0.3
SIP_L1_8	Male	long	1.4	0.5	0.4
SIP_L1_9	Female	long	1.2	0.6	0.4
SIP_L1_9	Male	long	1.8	0.5	0.3
SIP_L2_1	Female	long	1.8	0.7	0.2
SIP_L2_1	Male	long	1.6	0.5	0.2
SIP_L2_10	Female	long	1.4	0.4	0.3
SIP_L2_10	Male	long	1.8	0.4	0.5
SIP_L2_2	Female	long	1.8	0.4	0.2
SIP_L2_2	Male	long	1.2	0.6	0.2
SIP_L2_3	Female	long	1	0.3	0.2
SIP_L2_3	Male	long	1.2	0.4	0.5
SIP_L2_4	Female	long	1	0.7	0.2
SIP_L2_4	Male	long	1.2	0.5	0.3
SIP_L2_5	Female	long	1.4	0.5	0.4
SIP_L2_5	Male	long	2	0.6	0.4
SIP_L2_6	Female	long	1.2	0.6	0.2
SIP_L2_6	Male	long	1.8	0.7	0.3
SIP_L2_7	Female	long	1.4	0.5	0.2
SIP_L2_7	Male	long	1.2	0.8	0.2
SIP_L2_8	Female	long	2	0.6	0.5
SIP_L2_8	Male	long	2	0.7	0.2
SIP_S1_1	Female	short	1.2	0.5	0.3
SIP_S1_1	Male	short	1.4	0.6	0.3
SIP_S1_10	Female	short	1.2	0.4	0.4
SIP_S1_10	Male	short	1.4	0.6	0.3
SIP_S1_2	Female	short	1.8	0.5	0.3
SIP_S1_2	Male	short	1.6	0.6	0.2
SIP_S1_3	Female	short	1.2	0.5	0.3
SIP_S1_3	Male	short	1.2	0.4	0.3
SIP_S1_4	Female	short	1.2	0.6	0.2
SIP_S1_4	Male	short	1.4	0.5	0.5
SIP_S1_5	Female	short	1.6	0.4	0.4
SIP_S1_5	Male	short	0.8	0.7	0.5
SIP_S1_6	Female	short	1.4	0.5	0.1
SIP_S1_6	Male	short	1.4	0.4	0.3
SIP_S1_7	Female	short	1.2	0.6	0.3
SIP_S1_7	Male	short	1.4	0.6	0.2
SIP_S1_8	Female	short	1	0.8	0.3
SIP_S1_8	Male	short	1.2	0.3	0.3
SIP_S1_9	Female	short	1.2	0.3	0.3
SIP_S1_9	Male	short	0.2	0.5	0.3
SIP_S2_1	Female	short	1.4	0.6	0.4
SIP_S2_1	Male	short	1.8	0.5	0.4
SIP_S2_10	Female	short	1.6	0.4	0.2
SIP_S2_10	Male	short	2	0.4	0.1
SIP_S2_2	Female	short	1.6	0.5	0.3
SIP_S2_2	Male	short	1.2	0.5	0.4
SIP_S2_3	Female	short	1.8	0.6	0.4
SIP_S2_3	Male	short	2	0.7	0.1
SIP_S2_4	Female	short	1.6	0.5	0.4
SIP_S2_4	Male	short	1.4	0.5	0.1
SIP_S2_5	Female	short	1.4	0.6	0.3
SIP_S2_5	Male	short	1	0.4	0.2
SIP_S2_6	Female	short	1.8	0.4	0.4
SIP_S2_6	Male	short	1.2	0.4	0.3
SIP_S2_7	Female	short	1.8	0.7	0.2
SIP_S2_7	Male	short	1.4	0.6	0.4
SIP_S2_8	Female	short	1.2	0.4	0.4
SIP_S2_8	Male	short	1.6	0.6	0.4
SIP_S2_9	Female	short	1.2	0.6	0.6
SIP_S2_9	Male	short	1.4	0.6	0.3
